# Supplementary material for: Rational design of carbon nanocomposites with hierarchical porosity: a strategy to improve capacitive energy storage performance
Source: Royal Society of Chemistry journal article supplement (doi:10.1039/d3ma01003a), 2023-12-04
Supplement: d3ma01003a1.pdf [file d3ma01003a1.pdf]

## Supporting Information

# Rational design of carbon nanocomposites with the hierarchical porosity: a strategy to improve capacitive energy storage performance

*Agnieszka Hryniewicka<sup>1\*</sup>, Joanna Breczko<sup>1,2</sup>, Gabriela Siemiaszko<sup>1</sup>, Krzysztof Brzezinski<sup>3</sup>, Anna Ilnicka<sup>4</sup>, Artur P. Terzyk<sup>4</sup>, and Marta E. Plonska-Brzezinska<sup>1\*</sup>*

<sup>1</sup> Department of Organic Chemistry, Faculty of Pharmacy with the Division of Laboratory Medicine, Medical University of Białystok, Mickiewicza 2A, 15-222 Białystok, Poland

<sup>2</sup> Faculty of Chemistry, University of Białystok, Ciołkowskiego 1K, 15-245 Białystok, Poland

<sup>3</sup> Department of Structural Biology of Prokaryotic Organisms, Institute of Bioorganic Chemistry, Polish Academy of Sciences, Noskowskiego 12/14, 61-074 Poznań, Poland

<sup>4</sup> Faculty of Chemistry, Nicolaus Copernicus University in Toruń, Gagarin Street 7, 87-100 Toruń, Poland

## Table of contents

|                                                                                                                                                                                                                                                           |    |
|-----------------------------------------------------------------------------------------------------------------------------------------------------------------------------------------------------------------------------------------------------------|----|
| METHODS.....                                                                                                                                                                                                                                              | 3  |
| <b>Figure S1.</b> <sup>1</sup> H NMR spectrum of 1,4-bis(6-methylbenzo[d]thiazole-2-yl)-2,5-bis(4-cyanophenyl)-1,4-dihydropyrrolo[3,2-b]pyrrole ( <b>2CN-2</b> ).....                                                                                     | 7  |
| <b>Figure S2.</b> <sup>13</sup> C NMR spectrum of 1,4-bis(6-methylbenzo[d]thiazole-2-yl)-2,5-bis(4-cyanophenyl)-1,4-dihydropyrrolo[3,2-b]pyrrole ( <b>2CN-2</b> ).....                                                                                    | 7  |
| <b>Figure S3.</b> High-resolution mass spectrum of spectrum of 1,4-bis(6-methylbenzo[d]thiazole-2-yl)-2,5-bis(4-cyanophenyl)-1,4-dihydropyrrolo[3,2-b]pyrrole ( <b>2CN-2</b> ).....                                                                       | 8  |
| <b>Figure S4.</b> High-resolution mass spectrum of 1,2,4,5-tetrakis(4-cyanophenyl)-1,4-dihydropyrrolo[3,2-b]pyrrole ( <b>4CN-2</b> ).....                                                                                                                 | 8  |
| <b>Table S1.</b> Surface elemental composition of carbon samples determined by XPS and elemental analysis results.....                                                                                                                                    | 9  |
| <b>Figure S5.</b> XPS spectra of the C 1s spectral region of the CTF and CTF-CNO materials.....                                                                                                                                                           | 10 |
| <b>Figure S6.</b> <sup>13</sup> C CP-MAS NMR spectra of the CTF and CTF-CNO materials.....                                                                                                                                                                | 11 |
| <b>Table S2.</b> Chemical state, positions, FWHM, and relative area percentages of the deconvoluted C 1s peaks from the XPS analyses of CTF materials.....                                                                                                | 12 |
| <b>Table S3.</b> Chemical state, positions, FWHM, and relative % area of the deconvoluted C 1s peaks from the XPS analyses of CTF-CNO materials.....                                                                                                      | 12 |
| <b>Table S4.</b> Chemical state, positions, FWHM, and relative area percentages of the deconvoluted N 1s peaks from XPS analyses of CTF materials.....                                                                                                    | 13 |
| <b>Table S5.</b> Chemical state, positions, FWHM, and relative % area of the deconvoluted N 1s peaks from XPS analyses of CTF-CNO materials.....                                                                                                          | 13 |
| <b>Figure S7.</b> The differential pore size distribution of CTF and CTF-CNO materials.....                                                                                                                                                               | 14 |
| <b>Figure S8.</b> The cumulative pore volume of CTF and CTF-CNO materials.....                                                                                                                                                                            | 14 |
| <b>Figure S9.</b> Nyquist plots obtained for GCE electrodes covered with (a) CTF and (b) CTF-CNO materials at 0.4 V. (c) EIS spectra recorded for GCE modified with CTF-4CNO-1-CNO at different potentials and electrical equivalent circuit (inset)..... | 15 |
| <b>Figure S10.</b> TGA/DSC analysis of the selected pristine CTF and CTF-CNO materials. Analysis was performed in an air atmosphere.....                                                                                                                  | 16 |
| <b>Table S6.</b> Electrochemical properties of porous carbon materials containing triazines and carbon nanostructures.....                                                                                                                                | 17 |
| References .....                                                                                                                                                                                                                                          | 21 |

## METHODS

High-resolution transmission electron microscopy (HRTEM) was performed using a Titan G2 HRTEM microscope that was operated at 300 kV (FEI company) equipped with a field emission (FEG) gun. HRTEM imaging of the sample microstructure was performed in bright field mode using a CCD camera as a detector.

$^1\text{H}$  and  $^{13}\text{C}$  NMR spectra were recorded on an Agilent VNMRS system that was operated at 500 MHz for  $^1\text{H}$  NMR and 126 MHz for  $^{13}\text{C}$  NMR. The chemical shifts  $\delta$  are given in ppm, are in reference to the solvent peak of  $\text{CDCl}_3$ , and are defined at  $\delta$  7.26 ( $^1\text{H}$  NMR) or  $\delta$  77.16 ( $^{13}\text{C}$  NMR). The following abbreviations were used for multiplicities: s (singlet), d (doublet), m (multiplet).  $^{13}\text{C}$  CP-MAS NMR spectra were performed using Bruker Avance III 400 Wide Bore (9,4 T). The elemental analysis was performed using the Elementar Unicube CHNS analyzer.

High-resolution mass spectra were acquired using a MALDISynapt G2-S HDMS (Waters Corporation, Milford, MA, USA) coupled to a Waters TQD mass spectrometer (electrospray ionization mode ESI-tandem quadrupole).

Fourier transform infrared (FTIR) spectroscopy was performed using a Thermo Scientific Nicolet IN10 MX microscope (USA). The spectra were recorded with a KBr pellet using a microscope in transmission mode. The spectra were collected at a resolution of  $4\text{ cm}^{-1}$ , and 64 scans were averaged to obtain a single spectrum.

For X-ray powder diffraction (XRD), the samples were loaded into glass capillaries (Hampton Research, Glass Number 50) with a diameter of 0.5 mm. The XRD data were measured using  $\text{CuK}\alpha$  radiation at  $25\text{ }^\circ\text{C}$  on an XtalLAB Synergy diffractometer (Rigaku) equipped with the Hybrid Pixel 2-dimensional detector HyPix-6000HE. For all experiments, the sample-to-detector distance was set to 148 mm, and the data were recorded over a  $2\theta$

angle range from 10° to 100° using the standard phi scan procedure. In all experiments, the exposure time was 60 seconds.

X-ray photoelectron spectroscopy (XPS) was performed using an ultrahigh-vacuum (UHV) chamber (PREVAC) (base pressure below 10<sup>-8</sup> mbar) with a nonmonochromatic AlK $\alpha$  (1486.7 eV; 12 kV; 30 mA) radiation source (VG Scienta SAX 100) and monochromator (VG Scienta XM 780). The emitted photoelectrons were detected using a Scienta R4000 hemispherical analyzer. For all samples, a low-resolution survey run (0–1350 eV) at a pass energy of 200 eV was performed. The C 1s and N 1s high-resolution spectra were recorded at a pass energy of 20 eV at room temperature. The C 1s and N 1s spectra were fitted by Gaussian–Lorentzian functions after Shirley background subtraction was performed. The peaks were fitted using CasaXPS software (Casa Software Ltd.). The C KLL spectra (XAES) were obtained by XPS. The first-derivative XAES spectra were obtained using a 25-point Savitzky–Golay quadratic polynomial differentiation method.

Nitrogen adsorption-desorption isotherms (-196 °C) were measured using an ASAP 2020 Plus 2.00A (Micromeritics, USA) adsorption apparatus. Before the adsorption-desorption measurements were performed, all the samples were subjected to vacuum evacuation at 200 °C for at least 24 h.

A PGSTAT 302N potentiostat (Autolab B.V., Metrohm, Utrecht, the Netherlands) connected to a three-electrode system (working glassy carbon electrode (GCE, 10 x 2 mm), a silver/silver chloride reference electrode and an auxiliary platinum mesh electrode) or to a two-electrode system (two identical glassy carbon electrodes (GCE, 10 x 2 mm)) was used in voltammetric (CV) and galvanostatic (GCD) measurements, respectively. Electrochemical impedance spectroscopy (EIS) measurements were also performed in three-electrode configuration. EIS spectra were recorded using a 5 mV amplitude. All EIS spectra were recorded over the frequency range of 0.1 Hz to 10 kHz at open circuit potential (OCP). Before the measurements, the surface of the GCE electrode was polished by alumina (0.3  $\mu$ m) and

diamond (0.25 mm) paste and modified by deposition of 15  $\mu\text{L}$  of a solution containing CTF or CTF-CNO material dispersed in ethanol (3 mg  $\text{mL}^{-1}$ ) with the addition of 1 mg of conductive carbon paint (CP, SPI Supplies, USA) as a binder. The modification was complete when the solvent was evaporated at RT. The measurements were performed at the room temperature. The calculated electrode mass loading was about 0.86  $\text{mg}/\text{cm}^2$ . We performed at least 10 replicates for each electrochemical measurement. The CV, GCD, and EIS studies show representative curves for each group of measurements. Where calculated values for these methods are given, they are averaged, and the standard deviation is given for CVs: 10 measurements; GCD and EIS: 5 measurements. All electrochemical analyses were performed in a 1 M  $\text{H}_2\text{SO}_4$  solution.

In order to calculate specific capacitance, specific energy and specific power values the appropriate formulas were used.

For CV calculations:

$$C_s = \frac{\int_{V_1}^{V_2} i(V) dV}{2vm(V_2 - V_1)}$$

where:  $C_s$  - specific capacitance,  $i$  - current,  $v$  – scan rate,  $m$  - mass of material,  $V$  - potential

For GCD calculations:

$$C_s = \frac{it_d}{m\Delta V}$$

$$E_S = \frac{C_s \cdot (\Delta V)^2}{2 \cdot 3.6}$$

$$P_S = \frac{3600 \cdot E_S}{t_d}$$

where:  $C_s$  - specific capacitance,  $i$  - current,  $t_d$  - time of discharge,  $m$  - mass of material,  $\Delta V$  -potential difference,  $E_S$  – specific energy,  $P_S$  – specific power.

$E_S$  and  $P_S$  were calculated were calculated from the mean values of the GCD measurements given in Table 2.

# $^1\text{H}$ NMR and $^{13}\text{C}$ NMR SPECTROSCOPY

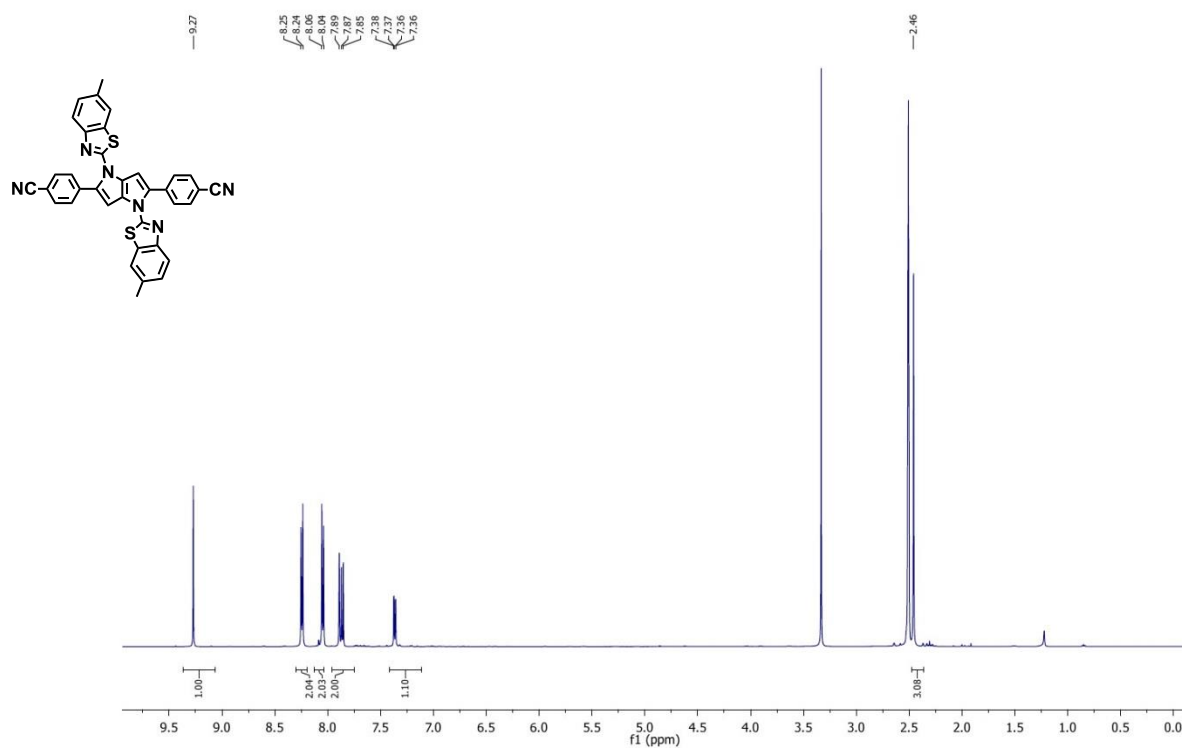

**Figure S1.**  $^1\text{H}$  NMR spectrum of 1,4-bis(6-methylbenzo[d]thiazole-2-yl)-2,5-bis(4-cyanophenyl)-1,4-dihydropyrrolo[3,2-b]pyrrole (2CN-2).

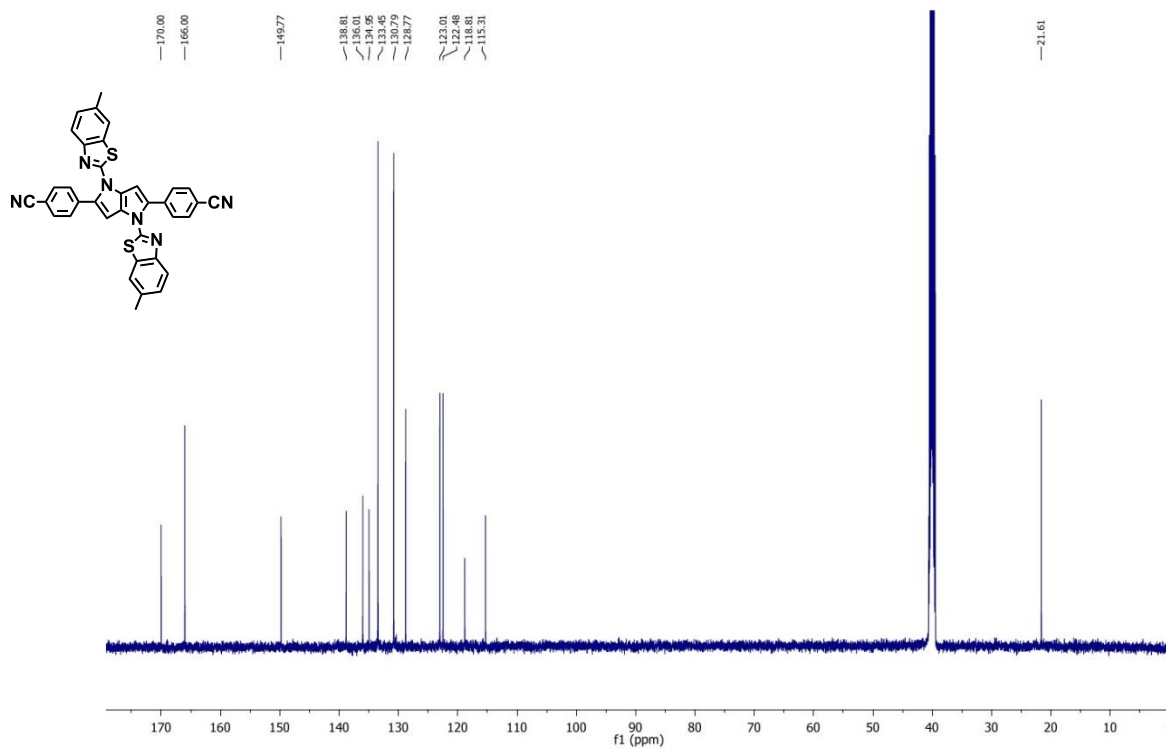

**Figure S2.**  $^{13}\text{C}$  NMR spectrum of 1,4-bis(6-methylbenzo[d]thiazole-2-yl)-2,5-bis(4-cyanophenyl)-1,4-dihydropyrrolo[3,2-b]pyrrole (2CN-2).

# MASS SPECTROMETRY

**Single Mass Analysis**  
Tolerance = 3.0 mDa / DBE: min = -1.5, max = 300.0  
Element prediction: Off  
Number of isotope peaks used for i-FIT = 3  
Monoisotopic Mass, Even Electron Ions  
50 formula(e) evaluated with 1 results within limits (up to 50 closest results for each mass)  
Elements Used:  
C: 0-300 H: 0-300 N: 0-6 S: 2-2

| Mass     | Calc. Mass | mDa | PPM | DBE  | Formula                                                       | i-FIT | i-FIT Norm | Fit Conf % | C  | H  | N | S |
|----------|------------|-----|-----|------|---------------------------------------------------------------|-------|------------|------------|----|----|---|---|
| 603.1434 | 603.1426   | 0.8 | 1.3 | 28.5 | C <sub>36</sub> H <sub>23</sub> N <sub>6</sub> S <sub>2</sub> | 65.3  | n/a        | n/a        | 36 | 23 | 6 | 2 |

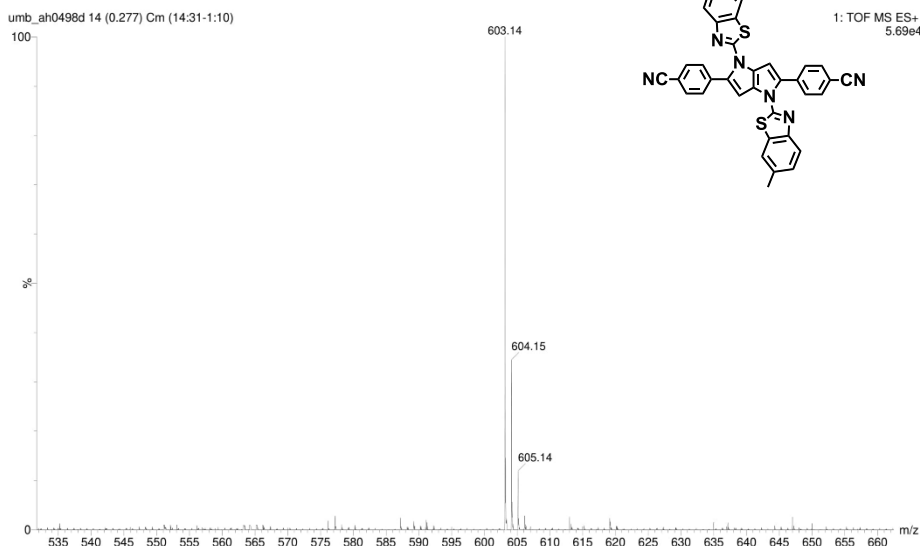

**Figure S3.** High-resolution mass spectrum of spectrum of 1,4-bis(6-methylbenzo[d]thiazole-2-yl)-2,5-bis(4-cyanophenyl)-1,4-dihydropyrrolo[3,2-b]pyrrole (2CN-2).

**Single Mass Analysis**  
Tolerance = 3.0 mDa / DBE: min = -1.5, max = 500.0  
Element prediction: Off  
Number of isotope peaks used for i-FIT = 3  
Monoisotopic Mass, Odd and Even Electron Ions  
45 formula(e) evaluated with 1 results within limits (all results (up to 1000) for each mass)  
Elements Used:  
C: 0-100 H: 0-100 N: 0-6

| Mass     | Calc. Mass | mDa | PPM | DBE  | Formula                                        | i-FIT | i-FIT Norm | Fit Conf % | C  | H  | N |
|----------|------------|-----|-----|------|------------------------------------------------|-------|------------|------------|----|----|---|
| 510.1596 | 510.1593   | 0.3 | 0.6 | 29.0 | C <sub>34</sub> H <sub>18</sub> N <sub>6</sub> | 362.2 | n/a        | n/a        | 34 | 18 | 6 |

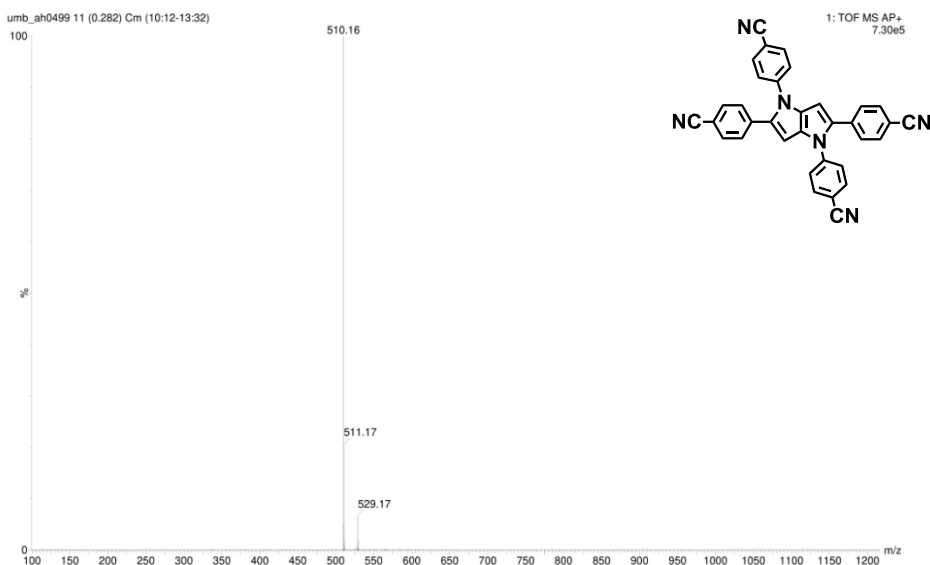

**Figure S4.** High-resolution mass spectrum of 1,2,4,5-tetrakis(4-cyanophenyl)-1,4-dihydropyrrolo[3,2-b]pyrrole (4CN-2).



## X-RAY PHOTOELECTRON SPECTROSCOPY and ELEMENTAL ANALYSIS

**Table S1.** Surface elemental composition of carbon samples determined by XPS and elemental analysis results.

| Sample               | XPS analysis |     |       | Elemental analysis |      |      |       |
|----------------------|--------------|-----|-------|--------------------|------|------|-------|
|                      | Elements (%) |     |       | Elements (%)       |      |      |       |
|                      | C            | N   | other | C                  | H    | N    | S     |
| <b>CTF-2CN-1</b>     | 86.5         | 6.6 | 6.8   | 64.63              | 1.50 | 6.98 | -     |
| <b>CTF-2CN-1-CNO</b> | 85.3         | 8.1 | 6.6   | 65.16              | 2.17 | 9.38 | -     |
| <b>CTF-2CN-2</b>     | 81.6         | 5.4 | 13    | 55.56              | 1.11 | 5.28 | 9.23  |
| <b>CTF-2CN-2-CNO</b> | 90.9         | 4.8 | 4.2   | 66.89              | 1.25 | 5.49 | 11.36 |
| <b>CTF-4CN-1</b>     | 86.5         | 7.5 | 6     | 67.28              | 1.70 | 7.56 | -     |
| <b>CTF-4CN-1-CNO</b> | 84.1         | 9.5 | 6.4   | 65.33              | 2.26 | 9.76 | -     |
| <b>CTF-4CN-2</b>     | 85.7         | 6.5 | 7.7   | 71.38              | 1.36 | 7.53 | -     |
| <b>CTF-4CN-2-CNO</b> | 89.9         | 4.3 | 5.7   | 73.34              | 1.76 | 6.25 | -     |

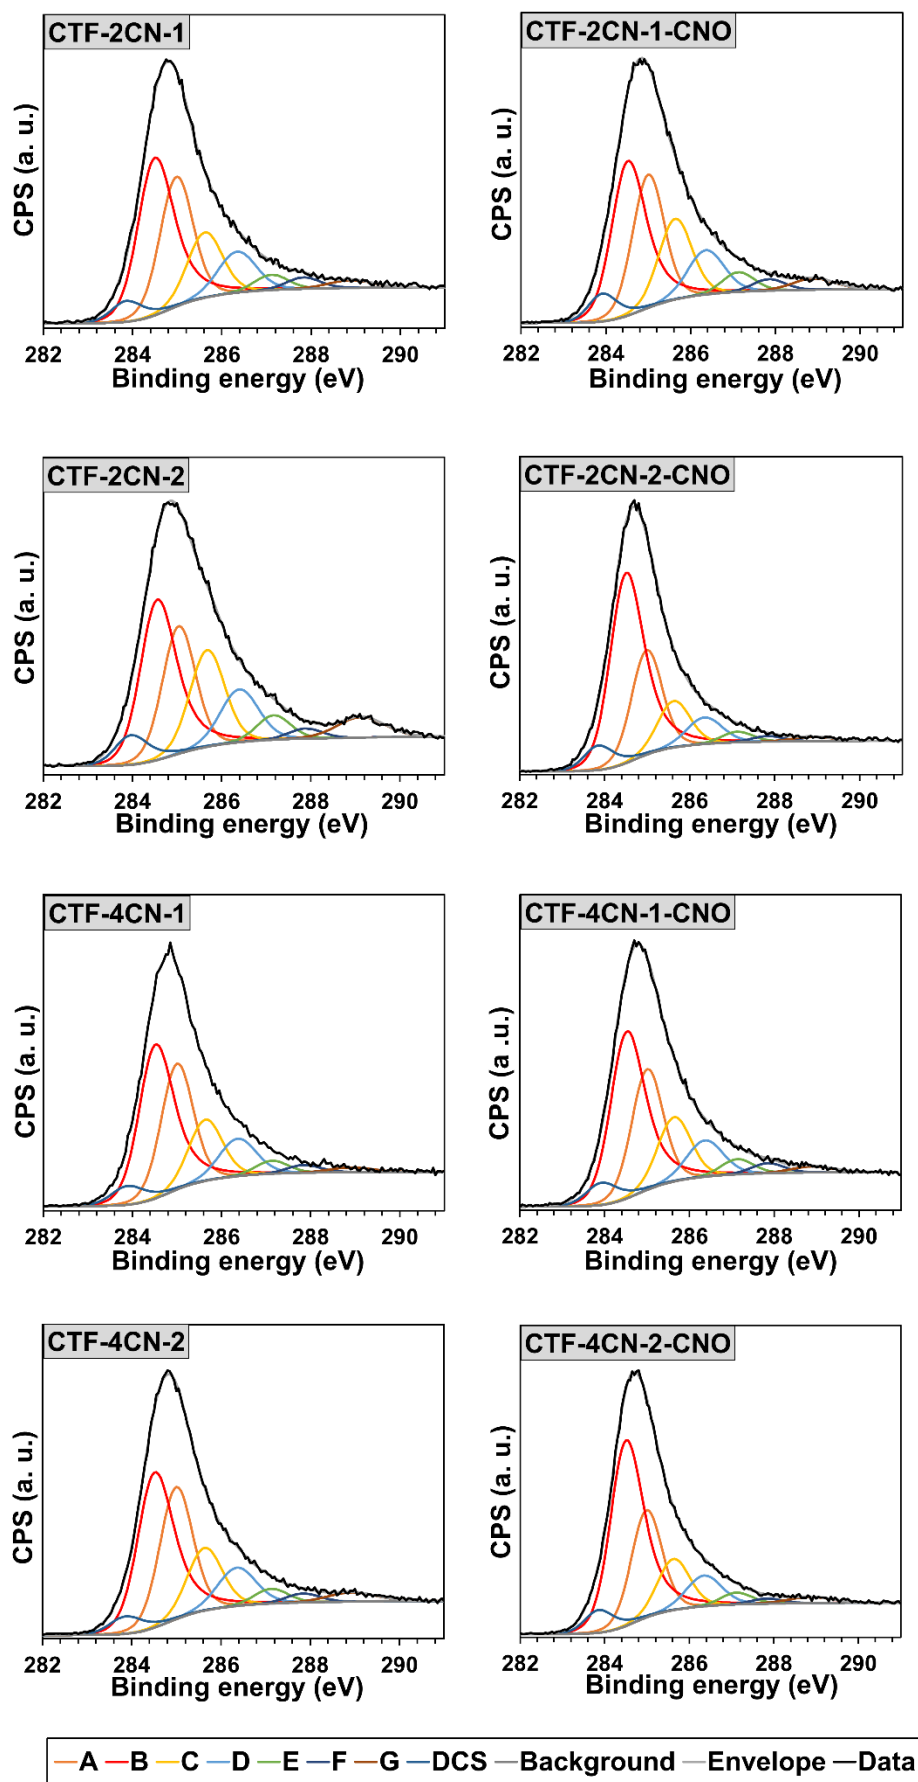

**Figure S5.** XPS spectra of the C 1s spectral region of the CTF and CTF-CNO materials.

## CP-MAS $^{13}\text{C}$ NMR SPECTROSCOPY

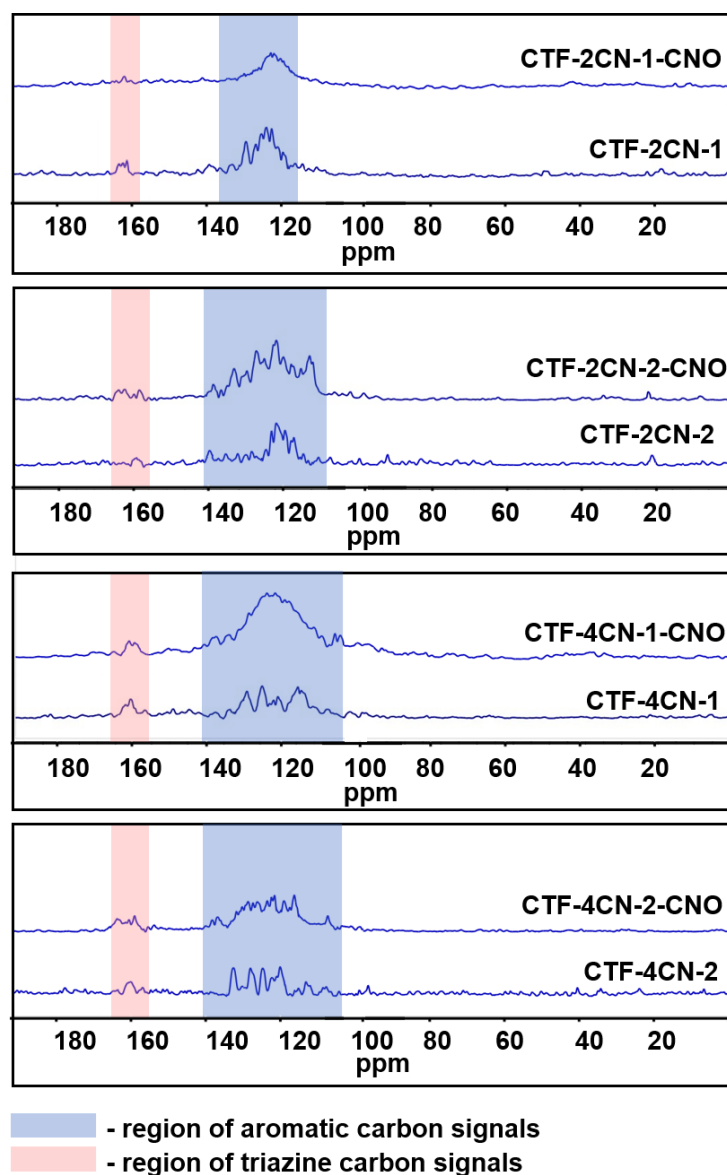

**Figure S6.**  $^{13}\text{C}$  CP-MAS NMR spectra of the CTF and CTF-CNO materials.

**Table S2.** Chemical state, positions, FWHM, and relative area percentages of the deconvoluted C 1s peaks from the XPS analyses of CTF materials.

| Region   | Species                     | CTF-2CN-1 |           |        | CTF-2CN-2 |           |        | CTF-4CN-1 |           |        | CTF-4CN-2 |           |        |
|----------|-----------------------------|-----------|-----------|--------|-----------|-----------|--------|-----------|-----------|--------|-----------|-----------|--------|
|          |                             | Peak (eV) | FWHM (eV) | % Area | Peak (eV) | FWHM (eV) | % Area | Peak (eV) | FWHM (eV) | % Area | Peak (eV) | FWHM (eV) | % Area |
| C 1s A   | C-H sp <sup>3</sup>         | 285.0     | 0.87      | 26.5   | 285.0     | 0.87      | 22.1   | 285.0     | 0.85      | 27.1   | 285.0     | 0.87      | 27.4   |
| C 1s B   | C=C sp <sup>2</sup>         | 284.5     | 0.91      | 37.7   | 284.5     | 0.91      | 32.7   | 284.5     | 0.88      | 39.0   | 284.5     | 0.91      | 37.8   |
| C 1s C   | C-C sp <sup>3</sup>         | 285.6     | 0.92      | 14.1   | 285.7     | 0.92      | 17.7   | 285.6     | 0.89      | 14.0   | 285.6     | 0.92      | 13.7   |
| C 1s D   | C=N                         | 286.3     | 1.01      | 9.7    | 286.4     | 1.01      | 10.6   | 286.4     | 0.98      | 9.4    | 286.4     | 1.01      | 9.2    |
| C 1s E   | C-O-C                       | 287.1     | 0.88      | 3.2    | 287.2     | 0.88      | 4.3    | 287.1     | 0.86      | 2.8    | 287.1     | 0.88      | 3.1    |
| C 1s F   | C=O                         | 287.8     | 0.89      | 2.4    | 287.9     | 0.89      | 1.8    | 287.9     | 0.87      | 1.8    | 287.8     | 0.89      | 1.9    |
| C 1s G   | C-N                         | 288.9     | 1.17      | 2.1    | 289.1     | 1.26      | 5.1    | 288.9     | 1.13      | 1.3    | 288.9     | 1.27      | 2.8    |
| C 1s DCS | defects in carbon structure | 283.8     | 0.80      | 4.4    | 283.9     | 0.85      | 5.7    | 283.9     | 0.86      | 4.7    | 283.8     | 0.86      | 4.0    |

**Table S3.** Chemical state, positions, FWHM, and relative % area of the deconvoluted C 1s peaks from the XPS analyses of CTF-CNO materials.

| Region   | Species                     | CTF-2CN-1-CNO |           |        | CTF-2CN-2-CNO |           |        | CTF-4CN-1-CNO |           |        | CTF-4CN-2-CNO |           |        |
|----------|-----------------------------|---------------|-----------|--------|---------------|-----------|--------|---------------|-----------|--------|---------------|-----------|--------|
|          |                             | Peak (eV)     | FWHM (eV) | % Area | Peak (eV)     | FWHM (eV) | % Area | Peak (eV)     | FWHM (eV) | % Area | Peak (eV)     | FWHM (eV) | % Area |
| C 1s A   | C-H sp <sup>3</sup>         | 285.0         | 0.87      | 25.4   | 285.0         | 0.85      | 22.9   | 285.0         | 0.87      | 24.9   | 285.0         | 0.85      | 23.1   |
| C 1s B   | C=C sp <sup>2</sup>         | 284.5         | 0.91      | 34.5   | 284.5         | 0.88      | 49.1   | 284.5         | 0.91      | 40.4   | 284.5         | 0.88      | 46.9   |
| C 1s C   | C-C sp <sup>3</sup>         | 285.6         | 0.92      | 16.2   | 285.6         | 0.90      | 10.8   | 285.6         | 0.92      | 14.0   | 285.6         | 0.89      | 11.6   |
| C 1s D   | C=N                         | 286.4         | 1.01      | 9.8    | 286.4         | 0.99      | 6.8    | 286.4         | 1.01      | 8.7    | 286.4         | 0.98      | 7.7    |
| C 1s E   | C-O-C                       | 287.1         | 0.89      | 3.8    | 287.1         | 0.86      | 2.4    | 287.1         | 0.89      | 3.2    | 287.1         | 0.86      | 2.6    |
| C 1s F   | C=O                         | 287.8         | 0.90      | 2.2    | 287.8         | 0.87      | 1.3    | 287.9         | 0.90      | 2.1    | 287.8         | 0.87      | 1.1    |
| C 1s G   | C-N                         | 288.9         | 1.17      | 2.9    | 288.9         | 1.14      | 1.3    | 288.9         | 1.17      | 1.7    | 288.9         | 1.27      | 1.9    |
| C 1s DCS | defects in carbon structure | 283.9         | 0.78      | 5.3    | 283.8         | 0.79      | 5.7    | 283.9         | 0.86      | 5.1    | 283.8         | 0.78      | 5.1    |

**Table S4.** Chemical state, positions, FWHM, and relative area percentages of the deconvoluted N 1s peaks from XPS analyses of CTF materials.

| Region | Species                    | CTF-2CN-1 |           |        | CTF-2CN-2 |           |        | CTF-4CN-1 |           |        | CTF-4CN-2 |           |        |
|--------|----------------------------|-----------|-----------|--------|-----------|-----------|--------|-----------|-----------|--------|-----------|-----------|--------|
|        |                            | Peak (eV) | FWHM (eV) | % Area | Peak (eV) | FWHM (eV) | % Area | Peak (eV) | FWHM (eV) | % Area | Peak (eV) | FWHM (eV) | % Area |
| N 1s A | triazine                   | 398.3     | 1.47      | 38.3   | 398.4     | 1.47      | 31.3   | 398.3     | 1.48      | 41.2   | 399.0     | 1.44      | 38.4   |
| N 1s B | pyrrolic                   | 400.0     | 1.49      | 33.6   | 400.0     | 1.47      | 37.5   | 400.0     | 1.48      | 28.5   | 400.0     | 1.47      | 30.8   |
| N 1s C | tertiary graphitic amine   | 401.2     | 1.49      | 23.6   | 401.2     | 1.49      | 24.4   | 401.2     | 1.48      | 23.3   | 401.1     | 1.47      | 25.0   |
| N 1s D | quaternary graphitic amine | 402.8     | 1.62      | 4.5    | 403.0     | 1.61      | 6.9    | 402.8     | 1.62      | 7.1    | 402.9     | 1.62      | 5.9    |

**Table S5.** Chemical state, positions, FWHM, and relative % area of the deconvoluted N 1s peaks from XPS analyses of CTF-CNO materials.

| Region | Species                    | CTF-2CN-1-CNO |           |        | CTF-2CN-2-CNO |           |        | CTF-4CN-1-CNO |           |        | CTF-4CN-2-CNO |           |        |
|--------|----------------------------|---------------|-----------|--------|---------------|-----------|--------|---------------|-----------|--------|---------------|-----------|--------|
|        |                            | Peak (eV)     | FWHM (eV) | % Area | Peak (eV)     | FWHM (eV) | % Area | Peak (eV)     | FWHM (eV) | % Area | Peak (eV)     | FWHM (eV) | % Area |
| N 1s A | triazine                   | 398.4         | 1.46      | 41.9   | 398.3         | 1.46      | 41.2   | 398.3         | 1.48      | 43.1   | 398.4         | 1.48      | 37.6   |
| N 1s B | pyrrolic                   | 400.0         | 1.47      | 32.6   | 400.0         | 1.46      | 31.2   | 400.0         | 1.46      | 34.0   | 400.0         | 1.49      | 31.3   |
| N 1s C | tertiary graphitic amine   | 401.1         | 1.47      | 21.3   | 401.2         | 1.48      | 21.7   | 401.2         | 1.47      | 17.9   | 401.2         | 1.48      | 25.2   |
| N 1s D | quaternary graphitic amine | 402.9         | 1.61      | 4.1    | 402.8         | 1.61      | 6.0    | 402.9         | 1.63      | 5.1    | 402.9         | 1.62      | 5.9    |

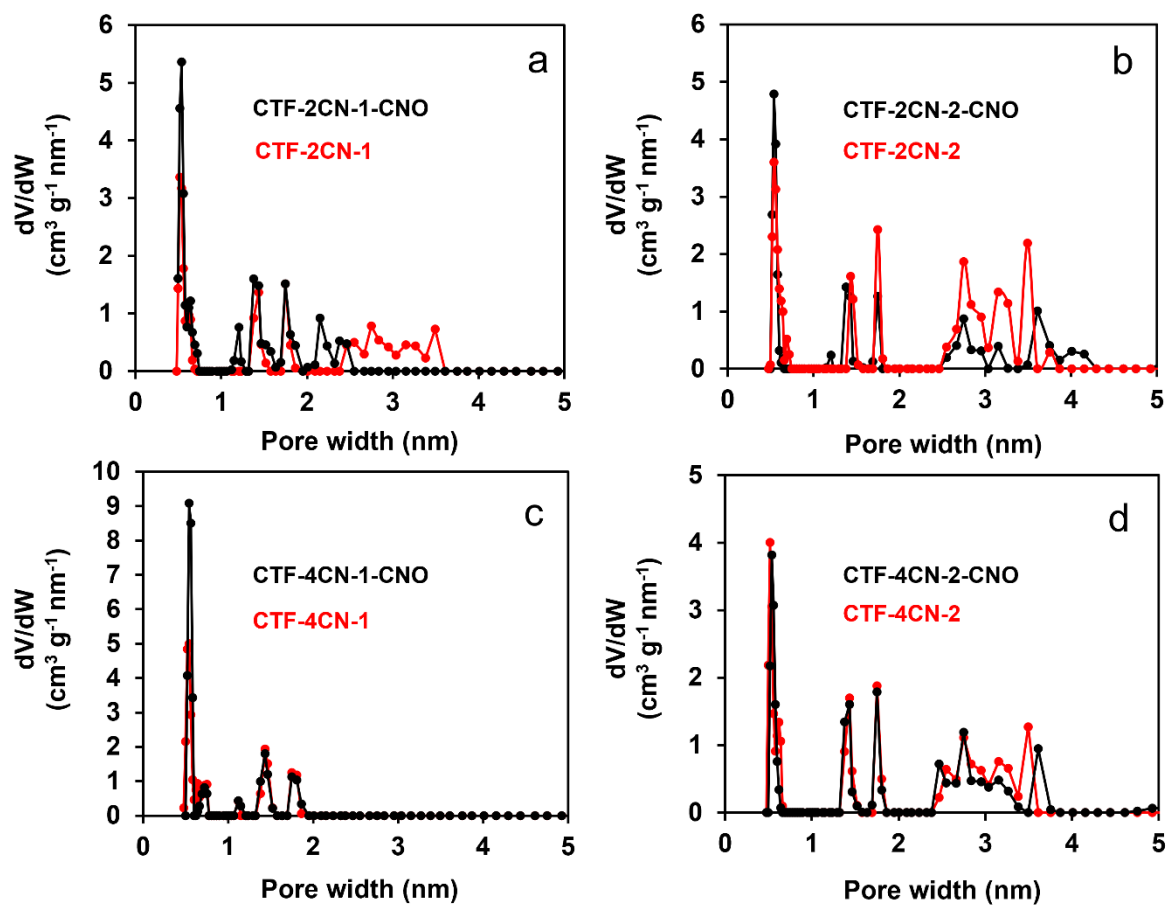

**Figure S7.** The differential nanopore size distribution of CTF and CTF-CNO materials.

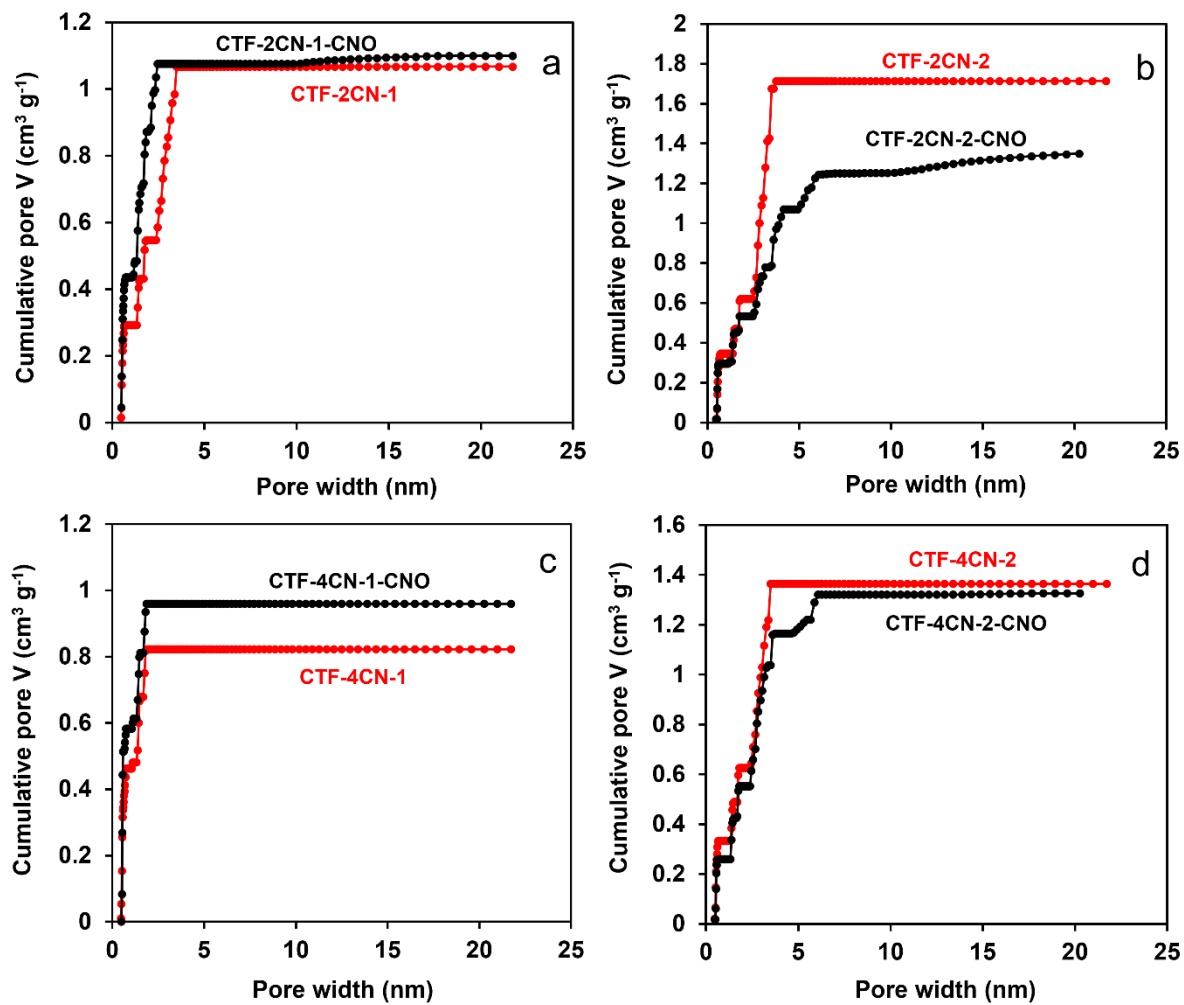

**Figure S8.** The cumulative nanopore volume of CTF and CTF-CNO materials.

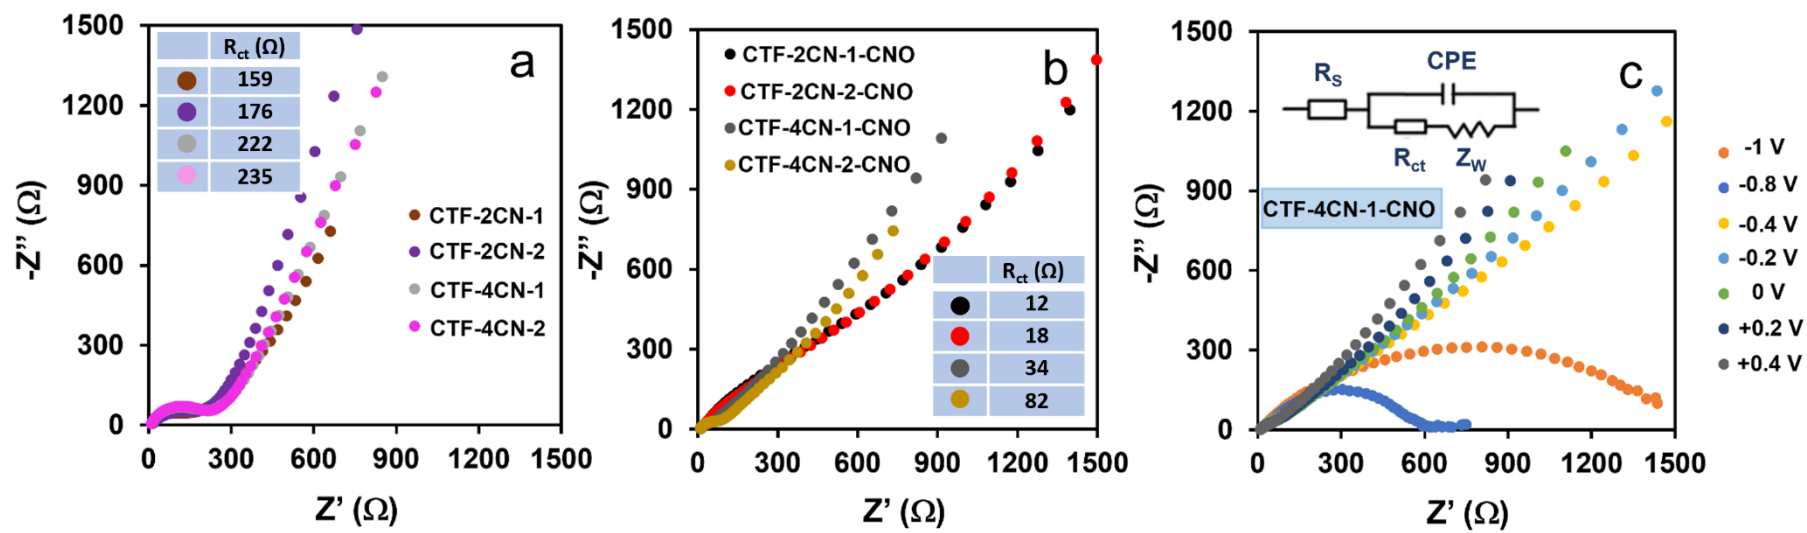

**Figure S9.** Nyquist plots obtained for GCE electrodes covered with (a) CTF and (b) CTF-CNO materials at 0.4 V. (c) EIS spectra recorded for GCE modified with CTF-4CNO-1-CNO at different potentials and electrical equivalent circuit (inset).



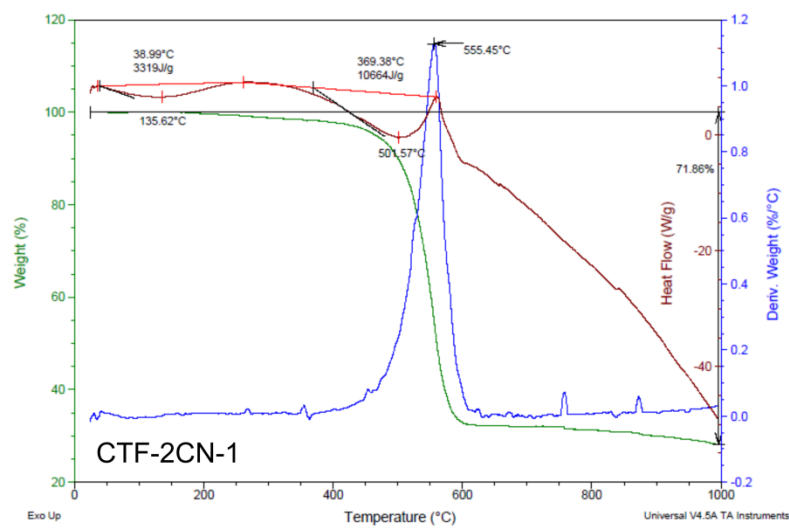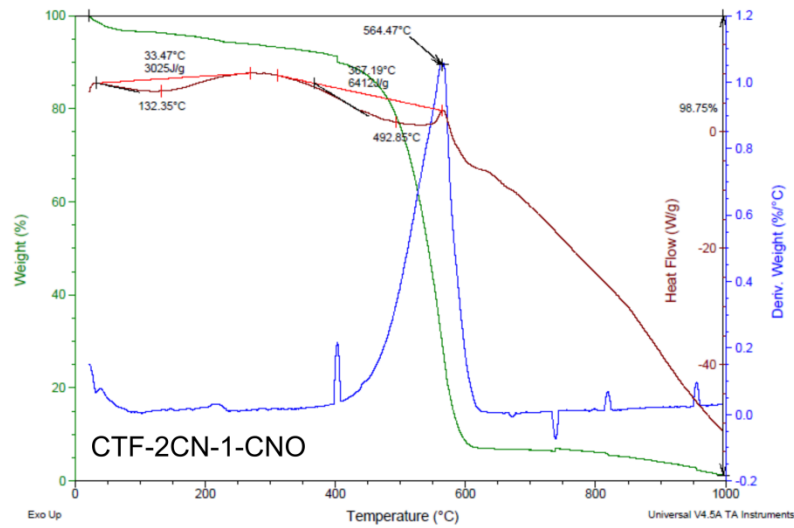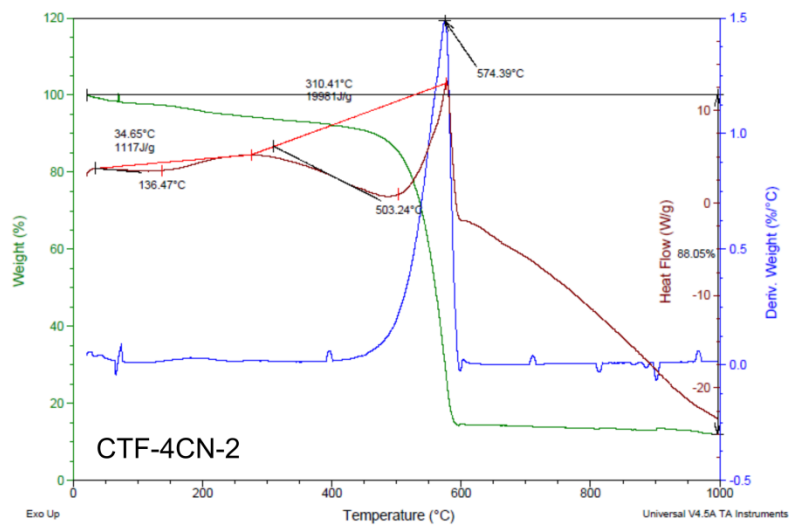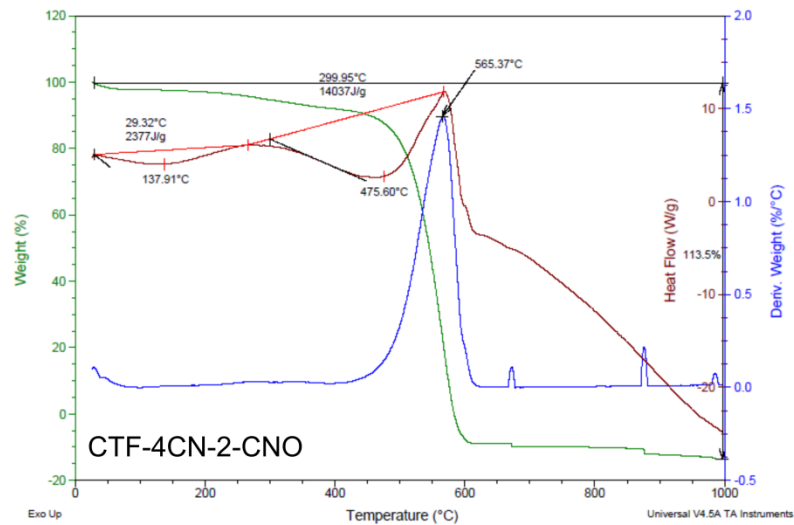

**Figure S10.** TGA/DSC analysis of the selected pristine CTF and CTF-CNO materials. Analysis was performed in an air atmosphere.

**Table S6.** Electrochemical properties of porous carbon materials containing triazine framework and their hybrids with carbon nanostructures.

| Material/Precursor                                                                                                         | Temperature of pyrolysis | Content of N (at%) | $S_{\text{BET}}$ ( $\text{m}^2 \text{g}^{-1}$ ) | Specific capacitance ( $\text{F g}^{-1}$ ) |              | Ref. |
|----------------------------------------------------------------------------------------------------------------------------|--------------------------|--------------------|-------------------------------------------------|--------------------------------------------|--------------|------|
|                                                                                                                            |                          |                    |                                                 | 3-electrodes                               | 2-electrodes |      |
| 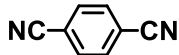<br>dicyanobenzene (terephthalonitrile)   | 600                      | 11.8               | 1558                                            | 220                                        | -            | 1    |
|                                                                                                                            | 700                      | 8.2                | 2581                                            | 171                                        | -            | 2    |
|                                                                                                                            | 400                      | 12.44              | 1175                                            | 248                                        | -            | 3    |
|                                                                                                                            | 450                      | 11.06              | 1565                                            | 276                                        | -            |      |
|                                                                                                                            | 500                      | 10.74              | 1681                                            | 285                                        | -            |      |
|                                                                                                                            | 550                      | 9.26               | 1724                                            | 298                                        | -            |      |
|                                                                                                                            | 600                      | 9.01               | 2197                                            | 263                                        | -            |      |
|                                                                                                                            | 650                      | 7.77               | 2098                                            | 273                                        | -            |      |
|                                                                                                                            | 700                      | 5.75               | 2237                                            | 243                                        | -            |      |
| <br>TIDN                                  | 550                      | -                  | 1283                                            | 210                                        | -            | 3    |
|                                                                                                                            | 600                      | -                  | -                                               | 231                                        | -            |      |
|                                                                                                                            | 650                      | -                  | -                                               | 202                                        | -            |      |
|                                                                                                                            | 700                      | -                  | 1527                                            | 198                                        | -            |      |
| <br>3,5-dicyanopyridine                   | 400                      | 28                 | 680                                             | -                                          | 0            | 4    |
|                                                                                                                            | 500                      | 23.5               | 1120                                            | -                                          | 0            |      |
|                                                                                                                            | 600                      | 15.8               | 1940                                            | -                                          | 60           |      |
|                                                                                                                            | 700                      | 12.7               | 3120                                            | -                                          | 141          |      |
| <br>fumaronitrile                       | 500                      | 34.2               | 460                                             | 79                                         | -            | 5    |
|                                                                                                                            | 600                      | 25.8               | 443                                             | 187                                        | -            |      |
|                                                                                                                            | 700                      | 20.9               | 1293                                            | 404                                        | -            |      |
|                                                                                                                            | 800                      | 16.5               | 1234                                            | 143                                        | -            |      |
|                                                                                                                            | 900                      | 14                 | 1268                                            | 220                                        | -            |      |
| <br>[1,1'-biphenyl]-4,4'-dicarbonitrile | 600                      | 4.7                | 1451                                            | 280                                        | -            | 1    |

|                                                                                                                 |                                                                                                                            |     |       |      |       |     |    |
|-----------------------------------------------------------------------------------------------------------------|----------------------------------------------------------------------------------------------------------------------------|-----|-------|------|-------|-----|----|
| Pristine CTF                                                                                                    | 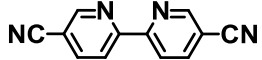<br>[2,2'-bipyridine]-5,5'-dicyanitrile   | 600 | 11.3  | 2278 | 393   | -   | 1  |
|                                                                                                                 | <br>2,3,5,6-tetrafluoroterephthalonitrile | 700 | 12.1  | 1849 | 326   | 115 | 6  |
|                                                                                                                 |                                                                                                                            | 400 | 19.9  | 1345 | 379   | -   | 7  |
|                                                                                                                 | <br>tetracyanoquinodimethane              | 800 | 8.13  | 3660 | 383   | -   | 8  |
|                                                                                                                 | <br>pyridine-2,6-dicyanitrile             | 500 | 23.14 | 604  | 285.8 | -   | 9  |
|                                                                                                                 |                                                                                                                            | 600 | 21.09 | 1099 | 340.1 | -   |    |
|                                                                                                                 |                                                                                                                            | 700 | 12.96 | 2316 | 363.3 | -   |    |
|                                                                                                                 |                                                                                                                            | 800 | 11.82 | 2795 | 406   | 246 |    |
|                                                                                                                 |                                                                                                                            | 600 | 13    | 2230 | 324   | -   | 1  |
|                                                                                                                 | <br>9,10-dicyanoanthracene                | 400 | -     | 406  | 435   | -   | 10 |
|                                                                                                                 |                                                                                                                            | 500 | -     | 751  | 589   | -   |    |
|                                                                                                                 | <br>polyethynylbenzonitrile             | 800 | 5.8   | 1954 | 628   | -   | 11 |
| <br>1,3,6,8-tetracyanopyrene | 500                                                                                                                        | -   | 1019  | 500  | -     | 12  |    |

|                                                                                              |                                                                                                                       |     |      |      |                            |                            |                   |
|----------------------------------------------------------------------------------------------|-----------------------------------------------------------------------------------------------------------------------|-----|------|------|----------------------------|----------------------------|-------------------|
| Pristine CTF                                                                                 | 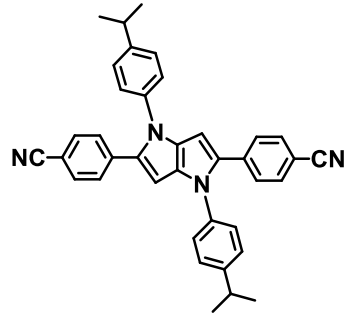<br>2CNPP                            | 500 | 1.6  | 1371 | 187                        | -                          | 13                |
|                                                                                              | 600                                                                                                                   | 4.3 | 1527 | 197  | -                          |                            |                   |
|                                                                                              | 700                                                                                                                   | 6.4 | 1052 | 255  | -                          |                            |                   |
|                                                                                              | <br>2CN-1 (terephthalonitrile)       | 700 | 6.6  | 1612 | 200                        | 81 (8 A g <sup>-1</sup> )  | <b>this study</b> |
|                                                                                              | <br>4CN-1 (tetracyanoquinodimethane) | 700 | 7.5  | 1835 | 269                        | 114 (8 A g <sup>-1</sup> ) |                   |
| <br>2CN-2   | 700                                                                                                                   | 5.4 | 2260 | 303  | 133 (8 A g <sup>-1</sup> ) |                            |                   |
| <br>4CN-2 | 700                                                                                                                   | 6.5 | 1962 | 291  | 123 (8 A g <sup>-1</sup> ) |                            |                   |

|                                   |                                                                                                                                      |     |      |        |                            |                                                          |                   |
|-----------------------------------|--------------------------------------------------------------------------------------------------------------------------------------|-----|------|--------|----------------------------|----------------------------------------------------------|-------------------|
| CTF-carbon nanostructures hybrids | 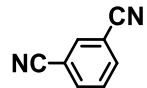<br><i>m</i> -phtalodinitrile<br>and graphene oxide | 800 | 6.3  | 1268.5 | 325                        | -                                                        | 14                |
|                                   | 2CNPP and CNOs                                                                                                                       | 600 | 4.5  | 1054   | 375                        | -                                                        | 13                |
|                                   |                                                                                                                                      | 700 | 3.6  | 2694   | 638                        | -                                                        |                   |
|                                   | 2CN-1 and CNOs                                                                                                                       | 700 | 8.1  | 2143   | 376                        | 131 (8 A g <sup>-1</sup> )                               | <b>this study</b> |
|                                   | 4CN-1 and CNOs                                                                                                                       | 700 | 9.5  | 2126   | 498                        | 302 (2 A g <sup>-1</sup> )<br>237 (8 A g <sup>-1</sup> ) |                   |
|                                   | 2CN-2 and CNOs                                                                                                                       | 700 | 4.8  | 1625   | 472                        | 205 (8 A g <sup>-1</sup> )                               |                   |
| 4CN-2 and CNOs                    | 700                                                                                                                                  | 4.3 | 1786 | 417    | 171 (8 A g <sup>-1</sup> ) |                                                          |                   |

## References

- (1) Zhang, Y.; Zhang, B.; Chen, L.; Wang, T.; Di, M.; Jiang, F.; Xu, X.; Qiao, S. Rational Design of Covalent Triazine Frameworks Based on Pore Size and Heteroatomic Toward High Performance Supercapacitors. *J. Colloid Interface Sci.* **2022**, *606*, 1534–1542. <https://doi.org/10.1016/j.jcis.2021.08.087>.
- (2) Baumann, D.; Lee, C.; Wan, C.; Sun, H.; Duan, X. Hierarchical Porous Carbon Derived from Covalent Triazine Frameworks for High Mass Loading Supercapacitors. *ACS Materials Lett.* **2019**, *1*, 320–326. <https://doi.org/10.1021/acsmaterialslett.9b00157>.
- (3) Hao, L.; Luo, B.; Li, X.; Jin, M.; Fang, Y.; Tang, Z.; Jia, Y.; Liang, M.; Thomas, A.; Yang, J.; Zhi, L. Terephthalonitrile-Derived Nitrogen-Rich Networks for High Performance Supercapacitors. *Energy Environ. Sci.* **2012**, *5*, 9747–9751. <https://doi.org/10.1039/C2EE22814A>.
- (4) Troschke, E.; Leistenschneider, D.; Rensch, T.; Grätz, S.; Maschita, J.; Ehrling, S.; Klemmed, B.; Lotsch, B. V.; Eychmüller, A.; Borchardt, L.; Kaskel, S. In Situ Generation of Electrolyte inside Pyridine- Based Covalent Triazine Frameworks for Direct Supercapacitor Integration. *ChemSusChem* **2020**, *13* (12), 3192–3198. <https://doi.org/10.1002/cssc.202000518>.
- (5) Wang, D.-G.; Wang, H.; Lin, Y.; Yu, G.; Song, M.; Zhong, W.; Kuang, G.-C. Synthesis and Morphology Evolution of Ultrahigh Content Nitrogen-Doped, Micropore-Dominated Carbon Materials as High-Performance Supercapacitors. *ChemSusChem* **2018**, *11* (22), 3932–3940. <https://doi.org/10.1002/cssc.201801892>.
- (6) Gao, Y.; Cui, P.; Liu, J.; Sun, W.; Chen, S.; Chou, S.; Lv, L.-P.; Wang, Y. Fluorine/Nitrogen Co-Doped Porous Carbons Derived from Covalent Triazine Frameworks for High-Performance Supercapacitors. *ACS Appl. Energy Mater.* **2021**, *4* (5), 4519–4529. <https://doi.org/10.1021/acsaem.1c00155>.
- (7) Gao, Y.; Zhi, C.; Cui, P.; Zhang, K. A. I.; Lv, L.-P.; Wang, Y. Halogen-Functionalized Triazine-Based Organic Frameworks Towards High Performance Supercapacitors. *Chem. Eng. J.* **2020**, *400*, 125967. <https://doi.org/10.1016/j.cej.2020.125967>.
- (8) Li, Y.; Zheng, S.; Liu, X.; Li, P.; Sun, L.; Yang, R.; Wang, S.; Wu, Z.-S.; Bao, X.; Deng, W.-Q. Conductive Microporous Covalent Triazine-Based Framework for High-Performance Electrochemical Capacitive Energy Storage. *Angew. Chem. Int. Ed.* **2018**, *57*, 7992–7996. <https://doi.org/10.1002/anie.201711169>.
- (9) Wu, C.; Zhang, H.; Hu, M.; Shan, G.; Gao, J.; Liu, J.; Zhou, X.; Yang, J. In Situ Nitrogen-Doped Covalent Triazine-Based Multiporous Cross-Linking Framework for High-Performance Energy Storage. *Adv. Electron. Mater.* **2020**, *6* (7), 2000253. <https://doi.org/10.1002/aelm.202000253>.
- (10) Mohamed, M. G.; Sharma, S. U.; Liu, N.-Y.; Mansoure, T. H.; Samy, M. M.; Chaganti, S. V.; Chang, Y.-L.; Lee, J.-T.; Kuo, S.-W. Ultrastable Covalent Triazine Organic Framework Based on Anthracene Moiety as Platform for High-Performance Carbon Dioxide Adsorption and Supercapacitors. *Int. J. Mol. Sci.* **2022**, *23*. <https://doi.org/10.3390/ijms23063174>.
- (11) Vadiyar, M. M.; Liu, X.; Ye, Z. Macromolecular Polyethynylbenzotrile Precursor-Based Porous Covalent Triazine Frameworks for Superior High-Rate High-Energy Supercapacitors. *ACS Appl. Mater. Interfaces* **2019**, *11*, 45805–45817. <https://doi.org/10.1021/acsaami.9b17847>.
- (12) Mohamed, M. G.; EL-Mahdy, A. F. M.; Takashi, Y.; Kuo, S.-W. Ultrastable Conductive Microporous Covalent Triazine Frameworks Based on Pyrene Moieties Provide High-Performance CO<sub>2</sub> Uptake and Supercapacitance. *New J. Chem.* **2020**, *44*, 8241–8253. <https://doi.org/10.1039/D0NJ01292K>.
- (13) Hryniewicka, A.; Breczko, J.; Siemiaszko, G.; Papathanassiou, A.; Góra-Marek, K.; Tarach, K. A.; Brzezinski, K.; Ilnicka, A.; Terzyk, A. P.; Markiewicz, K. H.; Echegoyen, L.; Plonska-Brzezinska, M. E. Pyrrolo[3,2-b]Pyrrole-Based Covalent Triazine Framework: Three-Dimensional Organization of Pores Using Nanostructural Spherical Carbon. *Chem RXiv* **2022**. <https://doi.org/10.26434/chemrxiv-2022-h0n3l>.
- (14) Peng, L.; Guo, Q.; Ai, Z.; Zhao, Y.; Liu, Y.; Wei, D. Nitrogen Doped Carbons Derived From Graphene Aerogel Templated Triazine-Based Conjugated Microporous Polymers for High-Performance Supercapacitors. *Front. Chem.* **2019**, *7*, 142. <https://doi.org/10.3389/fchem.2019.00142>.
